# Supplementary material for: Genetic Diversity and Possible Origins of the Hepatitis B Virus in Siberian Natives
Source: MDPI journal article supplement (doi:10.3390/v14112465), 2022-11-07
Supplement: s1 [file s1]

**Table S1.** Anthropological, genetic and linguistic summary for the studied Siberian native groups.

| Group                         | Conventional anthropological genesis [64]                                                                                                    | Dominant haplogroups [77-81]                                                                              | Languages (from family to local dialect) [82]                                         |
|-------------------------------|----------------------------------------------------------------------------------------------------------------------------------------------|-----------------------------------------------------------------------------------------------------------|---------------------------------------------------------------------------------------|
| <b>Altaians</b><br>(Southern) | Turks and Siberian Mongols;<br>~ 1 <sup>st</sup> millennium BCE                                                                              | <b>Y-chromosome:</b> R1a1 (60%), N (10%), O (6%), D (5%), Q (4%), C3 (2%)<br><b>Mt DNA:</b> C, U, D       | Turkic → Common Turkic → Kipchak → East Kipchak → Southern Altai                      |
| <b>Teleuts</b>                | Northern sub-ethnos of Altaians;<br>~ 4 <sup>th</sup> century CE                                                                             | <b>Y-chromosome:</b> R1a1 (34%), R1b (31%), N1c1 (26%), C3d (5%)                                          | Turkic → Common Turkic → Kipchak → East Kipchak → Southern Altai                      |
| <b>Kazakhs</b><br>(Altaian)   | Turks, South-Siberian Mongoloid tribes, Middle Eastern Arabic;<br>~13–15 centuries CE                                                        | <b>Y-chromosome:</b> C2 (43%), G1 (12%), R1a (11%), R1b (6%), J2 (6%), O (5%), N1 (5%)                    | Turkic → Common Turkic → Kipchak → South Kipchak → Kazakh                             |
| <b>Tuvans</b>                 | Middle Eastern Turk tribes, Xiongnu (or Hunnic, ancient Chinese Mongoloid tribes);<br>~ 1 <sup>st</sup> millennium BCE                       | <b>Y-chromosome:</b> N1b (25%), N1c1 (19%), C3 (16%), Q (14%), R1a1 (12%), R1b (3%)                       | Turkic → Common Turkic → South Siberian Turkic → Sayan → Tuvinian                     |
| <b>Khants</b>                 | Ugric, circumpolar paleo-Mongoloids (ancient aborigines),<br>~ 4 <sup>th</sup> century BCE – 2 <sup>nd</sup> century CE                      | <b>Y-chromosome:</b> N1b (57%), Q1a3 (21%), R1a1 (14%), N1c1 (7%)                                         | Uralic → Khantyic → West Khanty → Northern Khanty → Suryksarar Khanty                 |
| <b>Komi</b>                   | Finno-Ugric;<br>~ 1 <sup>st</sup> millennium BCE                                                                                             | <b>Y-chromosome:</b> R1a1 (60%), N1 (33%), R1b1 (5%), J2 (2%)<br><b>Mt DNA:</b> H, U, T                   | Uralic → Permian → Komi → Komi-Zyrian                                                 |
| <b>Nenets</b>                 | Samoyedic (Uralic Ugric), circumpolar paleo-Mongoloids (ancient aborigines),<br>~ 1 <sup>st</sup> –2 <sup>nd</sup> millennia CE (?)          | <b>Y-chromosome:</b> N1b (56,8%), N1c (40,5%), R1a1 (5%), Q (1,4%)                                        | Uralic → Samoyedic → Enets-Nenets → Nenets → Tundra Nenets                            |
| <b>Selkups</b>                | Eastern Samoyedic (Ugric),<br>~ 6 <sup>th</sup> century CE                                                                                   | <b>Y-chromosome:</b> Q (66,4%), R1a1 (19%), N1b (6,9%), R1b (6,1%)                                        | Uralic → Samoyedic → Kams-Selkup → Selkup                                             |
| <b>Kets</b>                   | Yenisean (from Yenisei River) paleo-Mongoloids, Samoyedic (Ugric);<br>~ 1 <sup>st</sup> –2 <sup>nd</sup> millennia CE                        | <b>Y-chromosome:</b> Q1a3 (84%), N1c1 (8%), N1b (4%), R1a1 (4%)<br><b>Mt DNA:</b> U, M, C, H, A           | Yenisean → Northern Yeniseian                                                         |
| <b>Nganasans</b>              | Polar Samoyedic;<br>~ 18 <sup>th</sup> century CE                                                                                            | <b>Y-chromosome:</b> N1b (92%), C (5%), O (3%)                                                            | Uralic → Samoyedic → Nganasan                                                         |
| <b>Dolgans</b>                | Northwestern sub-ethnos of Yakuts (see below);<br>~ 19 <sup>th</sup> century CE                                                              | <b>Y-chromosome:</b> C3c (35%), N3 (25%), E (5%)<br><b>Mt DNA:</b> C (55%), D (18%), F (5%)               | Turkic → Common Turkic → North Siberian Turkic → Dolgan                               |
| <b>Yakuts</b>                 | Evenks (ancient Tungus and paleo-Mongoloid derived tribes), Turks;<br>~10 <sup>th</sup> –16 <sup>th</sup> centuries CE                       | <b>Y-chromosome:</b> N3a (89%), R1a1 (3,7%), N2 (2,75%), C3xV77 (1,8%), C3c (1,8%)<br><b>Mt DNA:</b> C, D | Turkic → Common Turkic → North Siberian Turkic → Sakha                                |
| <b>Buryats</b>                | Northern Mongols (Xiongnu-derived peoples after later Uighur [Eastern Turkic] influence);<br>~6 <sup>th</sup> –12 <sup>th</sup> centuries CE | <b>Y-chromosome:</b> N1 (48%), C3 (40%), R1a1 (4%)<br><b>Mt DNA:</b> D, C                                 | Mongolic → Eastern Mongolic → Oirat-Khalkha → Khalkha-Buriat → Buriat → Russia Buriat |
| <b>Chukchi</b>                | Northeastern paleo-Mongoloids (likely share common ancestors with Native Americans);<br>~4 <sup>th</sup> –3 <sup>rd</sup> millennia BC       | <b>Y-chromosome:</b> N1c1 (61%), Q (24%), C3 (15%)<br><b>Mt DNA:</b> A, C, D                              | Chukotko-Kamchatkan → Chukotian → Chukchi                                             |
